# Supplementary material
Source: PubMed Central journal article supplement (PMC5495542)
Supplement: NIHMS867599-supplement-supplement_1.pdf [file NIHMS867599-supplement-supplement_1.pdf]

**Supplementary Table 1.** Included Formulations by Treatment

| Treatment             | Generic drug name                                      | Strength      | Product name                                                         | Master form description |
|-----------------------|--------------------------------------------------------|---------------|----------------------------------------------------------------------|-------------------------|
| Oral sodium phosphate | Na phosphate, dibasic/<br>Na phosphate, monobasic      | 0.398–1.102 g | Visicol (Salix Pharmaceuticals, Ltd, Raleigh, NC)                    | Tablet                  |
|                       | Na phosphate, dibasic/<br>Na phosphate, monobasic      | 0.398–1.102 g | OsmoPrep (Salix Pharmaceuticals)                                     | Tablet                  |
| PEG                   | K Cl/Na bicarbonate/Na Cl/<br>polyethylene glycol 3350 |               | TriLyte with flavor packs (Alaven Pharmaceutical, LLC, Marietta, GA) | Powder for solution     |
|                       | K Cl/Na bicarbonate/Na Cl/<br>polyethylene glycol 3350 |               | NuLYTELY (Braintree Laboratories, Inc, Braintree, MA)                | Powder for solution     |
|                       | Polyethylene glycol 3350                               | 17 g/dose     |                                                                      | Powder for solution     |
|                       | Polyethylene glycol 3350                               | 17 g/dose     | MiraLAX (Merck & Co, Inc, Whitehouse Station, NJ)                    | Powder for solution     |
|                       | Polyethylene glycol 3350                               | 17 g/packet   | MiraLAX (Merck & Co, Inc)                                            | Packet                  |
|                       | Polyethylene glycol 3350                               | 17 g/packet   | GlycoLax (Kremers Urban, LLC, Princeton, NJ)                         | Packet                  |
|                       | Polyethylene glycol 3350                               | 17 g/dose     | GlycoLax (Kremers Urban, LLC)                                        | Powder for solution     |

**Supplementary Table 2.** Covariate Definitions

| Covariate                    | Definition                                                                                                                                                                                                                                               |
|------------------------------|----------------------------------------------------------------------------------------------------------------------------------------------------------------------------------------------------------------------------------------------------------|
| Kidney stones                | ICD-9 codes: 592.0, 592.9, 274.1<br>CPT codes: 50060, 50065, 50075, 50080, 50081, 50130, 50561, 50580, 50590, 52352, 50610, 50620, 50630, 50945, 50945, 51060, 51065, 50961, 50980, 52320, 52325, 52330, 52327, 52332, 52334, 52353, 05504, 05503, 09851 |
| Hypercalciuria               | ICD-9 code: 275.4                                                                                                                                                                                                                                        |
| Diabetes mellitus            | ICD-9 codes: 249, 250                                                                                                                                                                                                                                    |
| Hypertension                 | ICD-9 code: 410                                                                                                                                                                                                                                          |
| Hyperlipidemia               | ICD-9 codes: 2720, 2721, 2722, 2724                                                                                                                                                                                                                      |
| Ischemic heart disease       | ICD-9 codes: 413, 414                                                                                                                                                                                                                                    |
| Heart failure                | ICD-9 code: 428                                                                                                                                                                                                                                          |
| Liver disease                | ICD-9 codes: 571, 572, 573                                                                                                                                                                                                                               |
| Chronic kidney disease       | ICD-9 codes: 403, 404, 582, 583, 585, 586, 588                                                                                                                                                                                                           |
| Other kidney disease         | ICD-9 codes: 580, 581, 582, 583, 587, 588, 589                                                                                                                                                                                                           |
| Atrial fibrillation          | ICD-9 code: 4273                                                                                                                                                                                                                                         |
| Systemic lupus erythematosus | ICD-9 code: 710                                                                                                                                                                                                                                          |
| Metabolic disorders          | ICD-9 codes: 2762, 2768, 2752                                                                                                                                                                                                                            |

CPT, Current Procedural Terminology; ICD-9, International Classification of Diseases, 9th revision.

**Supplementary Table 3.** HRs of the Risk of the Need for Dialysis in OSP Users Compared With PEG Users

| Analysis           | Exposure         | Crude   |            |      |           | Adjusted |           | PS matched |            |      |           |
|--------------------|------------------|---------|------------|------|-----------|----------|-----------|------------|------------|------|-----------|
|                    |                  | N       | Events (%) | HR   | 95% CI    | HR       | 95% CI    | N          | Events (%) | HR   | 95% CI    |
| Whole sample       | PEG              | 429,430 | 1874 (0.4) | –    | –         | –        | –         | 121,203    | 322 (0.3)  | –    | –         |
|                    | Sodium phosphate | 121,266 | 281 (0.2)  | 0.53 | 0.47–0.60 | 0.86     | 0.75–0.97 | 121,203    | 281 (0.2)  | 0.87 | 0.74–1.02 |
| On ACEi/ARB        | PEG              | 153,440 | 1254 (0.8) | –    | –         | –        | –         | 38,204     | 201 (0.5)  | –    | –         |
|                    | Sodium phosphate | 38,248  | 180 (0.5)  | 0.58 | 0.49–0.67 | 0.88     | 0.75–1.03 | 38,204     | 180 (0.5)  | 0.89 | 0.73–1.09 |
| With CKD           | PEG              | 5201    | 506 (9.7)  | –    | –         | –        | –         | 788        | 49 (6.2)   | –    | –         |
|                    | Sodium phosphate | 791     | 33 (4.2)   | 0.43 | 0.30–0.61 | 0.54     | 0.38–0.77 | 788        | 33 (4.2)   | 0.68 | 0.44–1.05 |
| ≥60 y              | PEG              | 198,486 | 1215 (0.6) | –    | –         | –        | –         | 45,806     | 194 (0.4)  | –    | –         |
|                    | Sodium phosphate | 45,895  | 171 (0.4)  | 0.61 | 0.52–0.72 | 0.96     | 0.82–1.13 | 45,806     | 171 (0.4)  | 0.88 | 0.72–1.08 |
| With diabetes      | PEG              | 68,371  | 923 (1.4)  | –    | –         | –        | –         | 15,101     | 136 (0.9)  | –    | –         |
|                    | Sodium phosphate | 15,117  | 116 (0.8)  | 0.57 | 0.47–0.69 | 0.80     | 0.66–0.98 | 15,101     | 116 (0.8)  | 0.85 | 0.67–1.09 |
| With kidney stones | PEG              | 7969    | 60 (0.8)   | –    | –         | –        | –         | 2202       | 9 (0.4)    | –    | –         |
|                    | Sodium phosphate | 2210    | 5 (0.2)    | 0.30 | 0.12–0.75 | 0.47     | 0.18–1.19 | 2202       | 5 (0.2)    | 0.56 | 0.19–1.67 |
| Hypercalciuria     | PEG              | 1864    | 22 (1.2)   | –    | –         | –        | –         | 547        | 3 (0.6)    | –    | –         |
|                    | Sodium phosphate | 558     | 3 (0.5)    | 0.45 | 0.14–1.51 | 0.60     | 0.14–2.57 | 547        | 3 (0.6)    | 1.00 | 0.20–4.96 |
| On NSAIDs          | PEG              | 118,078 | 488 (0.4)  | –    | –         | –        | –         | 33,300     | 81 (0.2)   | –    | –         |
|                    | Sodium phosphate | 33,321  | 81 (0.2)   | 0.59 | 0.47–0.74 | 0.93     | 0.74–1.19 | 33,300     | 81 (0.2)   | 1.00 | 0.73–1.36 |
| On thiazides       | PEG              | 108,878 | 669 (0.6)  | –    | –         | –        | –         | 28,433     | 114 (0.4)  | –    | –         |
|                    | Sodium phosphate | 28,468  | 102 (0.4)  | 0.58 | 0.47–0.72 | 0.92     | 0.74–1.13 | 28,433     | 102 (0.4)  | 0.89 | 0.68–1.17 |

ACEi, angiotensin-converting enzyme inhibitor; ARB, angiotensin receptor blocker; NSAID, nonsteroidal anti-inflammatory drug.

**Supplementary Table 4.** HRs of the Risk of AKI Requiring Dialysis in OSP Users Compared With PEG Users

| Analysis           | Exposure         | Crude   |            |      |           | Adjusted |           | PS matched |            |      |           |
|--------------------|------------------|---------|------------|------|-----------|----------|-----------|------------|------------|------|-----------|
|                    |                  | N       | Events (%) | HR   | 95% CI    | HR       | 95% CI    | N          | Events (%) | HR   | 95% CI    |
| Whole sample       | PEG              | 429,430 | 236 (0.05) | –    | –         | –        | –         | 121,203    | 41 (0.03)  | –    | –         |
|                    | Sodium phosphate | 121,266 | 29 (0.02)  | 0.63 | 0.55–0.72 | 0.86     | 0.75–0.99 | 121,203    | 29 (0.02)  | 0.71 | 0.44–1.14 |
| With CKD           | PEG              | 5201    | 61 (1.17)  | –    | –         | –        | –         | 788        | 7 (0.89)   | –    | –         |
|                    | Sodium phosphate | 791     | 5 (0.63)   | 0.74 | 0.48–1.15 | 0.91     | 0.58–1.43 | 788        | 5 (0.63)   | 0.71 | 0.23–2.23 |
| ≥60 y              | PEG              | 198,486 | 167 (0.08) | –    | –         | –        | –         | 45,806     | 30 (0.07)  | –    | –         |
|                    | Sodium phosphate | 45,895  | 19 (0.04)  | 0.67 | 0.56–0.79 | 0.83     | 0.70–0.99 | 45,806     | 19 (0.04)  | 0.63 | 0.36–1.13 |
| With diabetes      | PEG              | 68,371  | 111 (0.16) | –    | –         | –        | –         | 15,101     | 15 (0.10)  | –    | –         |
|                    | Sodium phosphate | 15,117  | 13 (0.09)  | 0.60 | 0.47–0.76 | 0.77     | 0.60–0.98 | 15,101     | 13 (0.09)  | 0.87 | 0.41–1.82 |
| With kidney stones | PEG              | 7969    | 10 (0.13)  | –    | –         | –        | –         | 2202       | 1 (0.05)   | –    | –         |
|                    | Sodium phosphate | 2210    | 0 (0.00)   | 0.80 | 0.41–1.60 | 1.01     | 0.49–2.07 | 2202       | 0 (0.00)   | –    | –         |
| Hypercalciuria     | PEG              | 1864    | 2 (0.11)   | –    | –         | –        | –         | 547        | 0 (0.0)    | –    | –         |
|                    | Sodium phosphate | 558     | 1 (0.18)   | 1.67 | 0.57–4.88 | 2.80     | 0.84–9.29 | 547        | 1 (0.18)   | –    | –         |
| On ACEi/ARB        | PEG              | 153,440 | 146 (0.10) | –    | –         | –        | –         | 38,204     | 21 (0.05)  | –    | –         |
|                    | Sodium phosphate | 38,248  | 19 (0.05)  | 0.70 | 0.59–0.83 | 0.89     | 0.75–1.05 | 38,204     | 19 (0.05)  | 0.90 | 0.49–1.68 |
| On NSAIDs          | PEG              | 118,078 | 65 (0.06)  | –    | –         | –        | –         | 33,300     | 12 (0.04)  | –    | –         |
|                    | Sodium phosphate | 33,321  | 10 (0.03)  | 0.63 | 0.49–0.81 | 0.84     | 0.65–1.08 | 33,300     | 10 (0.03)  | 0.83 | 0.36–1.93 |
| On thiazides       | PEG              | 108,878 | 87 (0.08)  | –    | –         | –        | –         | 28,433     | 16 (0.06)  | –    | –         |
|                    | Sodium phosphate | 28,468  | 11 (0.04)  | 0.65 | 0.52–0.81 | 0.82     | 0.66–1.02 | 28,433     | 11 (0.04)  | 0.69 | 0.32–1.48 |

ACEi, angiotensin-converting enzyme inhibitor; ARB, angiotensin receptor blocker; NSAID, nonsteroidal anti-inflammatory drug.

**Supplementary Table 5.** HRs of the Risk of Any Renal Failure in OSP Users Compared With PEG Users

| Analysis           | Exposure         | Crude   |            |      |           | Adjusted |           | PS matched |            |      |           |
|--------------------|------------------|---------|------------|------|-----------|----------|-----------|------------|------------|------|-----------|
|                    |                  | N       | Events (%) | HR   | 95% CI    | HR       | 95% CI    | N          | Events (%) | HR   | 95% CI    |
| Whole sample       | PEG              | 429,430 | 3366 (0.8) | –    | –         | –        | –         | 121,203    | 653 (0.5)  | –    | –         |
|                    | Sodium phosphate | 121,266 | 562 (0.5)  | 0.59 | 0.54–0.65 | 0.87     | 0.80–0.96 | 121,203    | 562 (0.5)  | 0.86 | 0.77–0.96 |
| With CKD           | PEG              | 5201    | 735 (14.1) | –    | –         | –        | –         | 788        | 80 (10.2)  | –    | –         |
|                    | Sodium phosphate | 791     | 58 (7.3)   | 0.51 | 0.39–0.66 | 0.63     | 0.48–0.82 | 788        | 58 (7.4)   | 0.72 | 0.51–1.01 |
| ≥60 y              | PEG              | 198,486 | 2274 (1.2) | –    | –         | –        | –         | 45,803     | 378 (0.8)  | –    | –         |
|                    | Sodium phosphate | 45,895  | 342 (0.8)  | 0.65 | 0.58–0.73 | 0.91     | 0.81–1.02 | 45,803     | 342 (0.8)  | 0.91 | 0.78–1.05 |
| With diabetes      | PEG              | 68,371  | 1501 (2.2) | –    | –         | –        | –         | 15,101     | 238 (1.6)  | –    | –         |
|                    | Sodium phosphate | 15,117  | 198 (1.3)  | 0.56 | 0.51–0.69 | 0.80     | 0.69–0.93 | 15,101     | 197 (1.3)  | 0.83 | 0.69–1.00 |
| With kidney stones | PEG              | 7969    | 107 (1.3)  | –    | –         | –        | –         | 2202       | 23 (1.0)   | –    | –         |
|                    | Sodium phosphate | 2210    | 18 (0.8)   | 0.61 | 0.37–1.01 | 0.85     | 0.51–1.41 | 2202       | 18 (0.8)   | 0.78 | 0.42–1.45 |
| Hypercalciuria     | PEG              | 1864    | 35 (1.9)   | –    | –         | –        | –         | 547        | 8 (1.5)    | –    | –         |
|                    | Sodium phosphate | 558     | 8 (1.4)    | 0.76 | 0.35–1.64 | 1.18     | 0.49–2.83 | 547        | 8 (1.5)    | 1.00 | 0.38–2.66 |
| On ACEi/ARB        | PEG              | 153,440 | 2264 (1.5) | –    | –         | –        | –         | 38,204     | 420 (1.1)  | –    | –         |
|                    | Sodium phosphate | 38,248  | 367 (1.0)  | 0.65 | 0.58–0.72 | 0.90     | 0.81–1.01 | 38,204     | 367 (1.0)  | 0.87 | 0.76–1.00 |
| On NSAIDs          | PEG              | 118,078 | 940 (0.8)  | –    | –         | –        | –         | 33,300     | 174 (0.5)  | –    | –         |
|                    | Sodium phosphate | 33,321  | 165 (0.5)  | 0.62 | 0.53–0.73 | 0.89     | 0.75–1.05 | 33,300     | 165 (0.5)  | 0.95 | 0.77–1.17 |
| On thiazides       | PEG              | 108,878 | 1282 (1.2) | –    | –         | –        | –         | 28,433     | 257 (0.9)  | –    | –         |
|                    | Sodium phosphate | 28,468  | 214 (0.8)  | 0.64 | 0.55–0.74 | 0.89     | 0.77–1.03 | 28,433     | 213 (0.8)  | 0.83 | 0.69–0.99 |

ACEi, angiotensin-converting enzyme inhibitor; ARB, angiotensin receptor blocker; NSAID, nonsteroidal anti-inflammatory drug.
